# Supplementary material
Source: PubMed Central journal article supplement (PMC2583444)

Beckman ultracentrifuge and a SW 41 rotor for 16~20 h at 4°C. Following ultracentrifugation, twelve 1-ml fractions were collected from the bottom of the gradient tube using a peristaltic pump (RAININ). FLAG-mDOR and caveolin-1 in each fraction were examined by Western blot as mentioned in MATERIALS AND METHODS. **(B) Co-immunoprecipitation of G<sub>αi</sub> proteins and caveolin-1 in CHO-FLAG-mDOR cells was reduced by MCD treatment.** Cells were treated with vehicle or 2% MCD and harvested as described under Materials and Methods. Cells were solubilized with 2% Triton X-100 and then centrifuged at 100,000 x g. The supernatant was incubated with rabbit anti-G<sub>αi-3</sub> antibody, which recognizes all G<sub>αi</sub> proteins, or normal rabbit serum and then with Protein A/G PLUS-Agarose. Immunoprecipitated materials were dissolved in 2X Laemmli loading buffer, resolved in 10% SDS-PAGE and transferred to Immobilon-P PVDF membranes. Immunoblotting was performed with a monoclonal antibody against caveolin-1 (top panel). One tenth of the supernatant was resolved and blotted as well. The membranes were then stripped and blotted again with the rabbit anti-G<sub>αi-3</sub> antibody (bottom panel). The figures represent one of the three experiments performed with similar results.

**Fig. S1. Discontinuous and continuous sucrose density gradients and collection of 12 1-ml fractions.**

**Fig. S2. About 70% of opioid receptors in membranes of the rat caudate putamen (CPu) locate in rafts fractions with a 5-20% sucrose density.** Rat CPu membranes were sonicated in 0.5 M sodium carbonate buffer (pH 11) and then fractionated through a continuous sucrose gradient (**Fractions 1~8: 5%~35%; Fractions 9~12: 45%**) by ultracentrifugation as described under Materials and Methods (Fig. S1). Twelve 1-ml fractions were collected and each fraction was subjected to

**(A) Determination of cholesterol contents.** Data are expressed as the ratios of [cholesterol in each fraction]/ [total phospholipids].

**(B) Determination of GM1 levels** by a dot-blot assay with an anti-GM1 antibody.

**(C) [<sup>3</sup>H]diprenorphine (~1nM) binding** using naloxone (10 μM) to define nonspecific binding. Two 100-μl aliquots from each fraction were used in binding in duplicate as described in Materials and Methods. Data are expressed as % of total specific [<sup>3</sup>H]diprenorphine binding.

**(D) SDS-PAGE, transfer to membranes and protein staining with Ponceau S.**

In this set of experiments, CPu membranes prepared from 6 rats were used for fractionation. The average [<sup>3</sup>H]diprenorphine specific binding in the fraction 1 was 6,801 /100 µl for rat CPu, respectively. Data in Fig. 1A and 1C are shown as mean ± s.e.m. of three independent experiments. Figures 1B and 1D represent one of the three experiments performed with similar results.

**Fig. S3. Full agonists moved some DOR out of lipid rafts but partial or inverse agonists did not.** NG108-15 cells were left untreated or incubated in the media in the presence of **(A)** 1 µM DPDPE, deltorphin II or etorphine **(B)** 1 µM levorphanol, ICI174864 or 10 µM morphine for 30 min at 37°C. See Fig. 4 legend for more information. Data shown in **(A)** represents one of the two experiments performed with similar results. Data in **(B)** are shown as mean ± s.e.m. of at least three independent experiments.

**Fig. S4. Effect of etorphine to shift DOR out of lipid rafts was not affected by pertussis toxin (PTX) pretreatment.** NG108-15 cells were treated with 100 ng/ ml PTX for 24 hrs, and were then incubated in the absence or presence of 1 µM etorphine for 30 min at 37°C. See Fig. 4 legend for more information. Data shown represents one of the two experiments performed with similar results.

Fig.S1

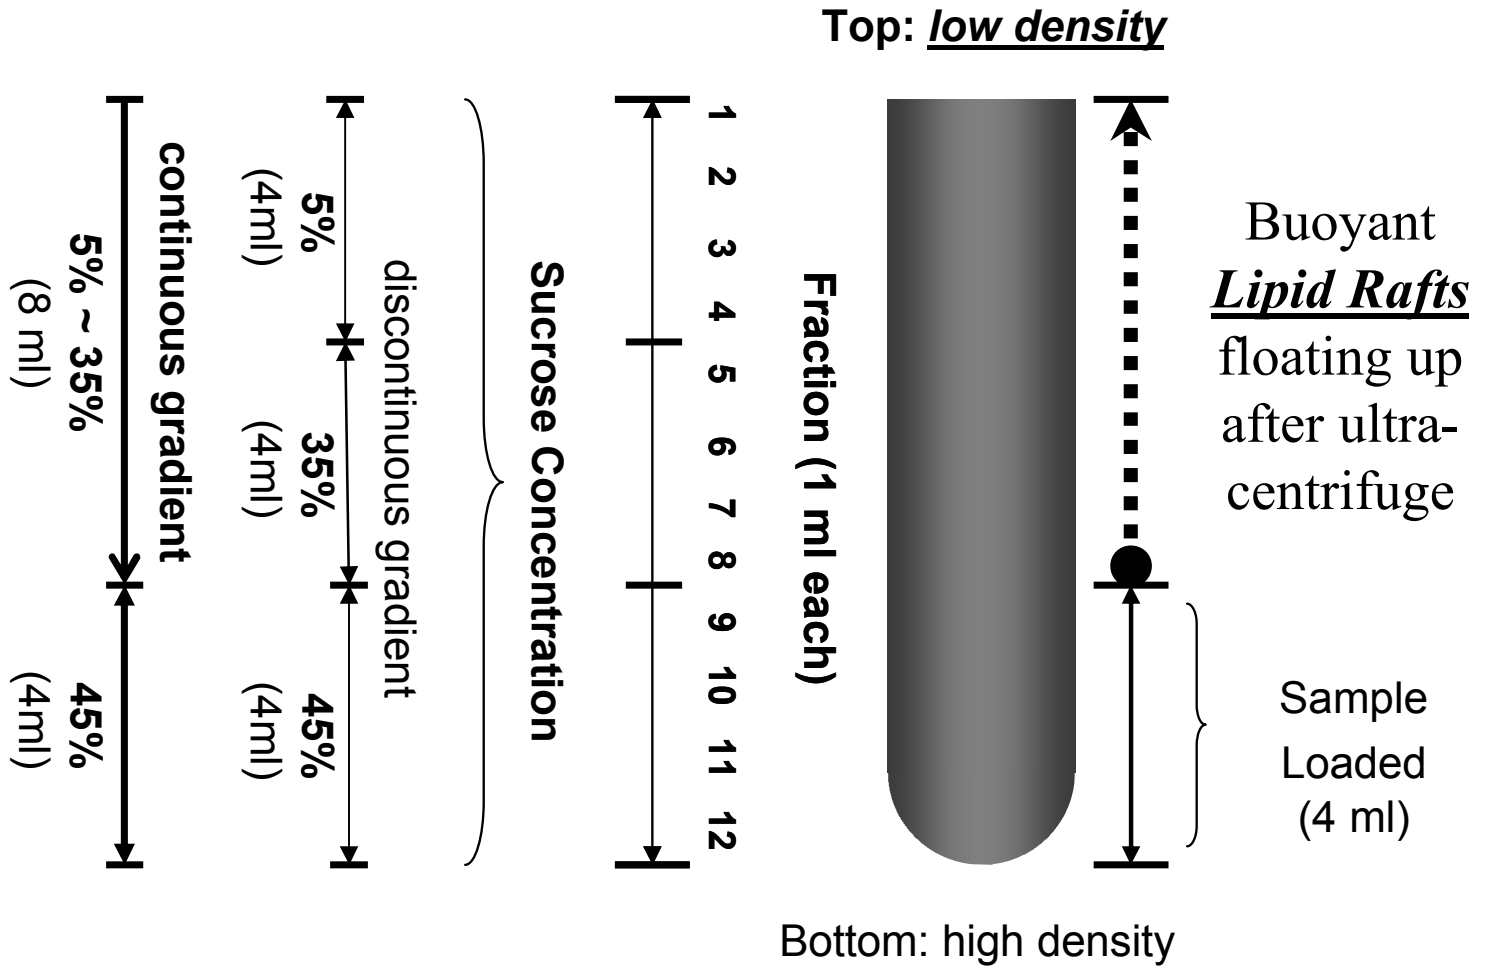

Fig. S2

# Rat Brain Caudate Putamen (CPu) *continuous sucrose gradient*

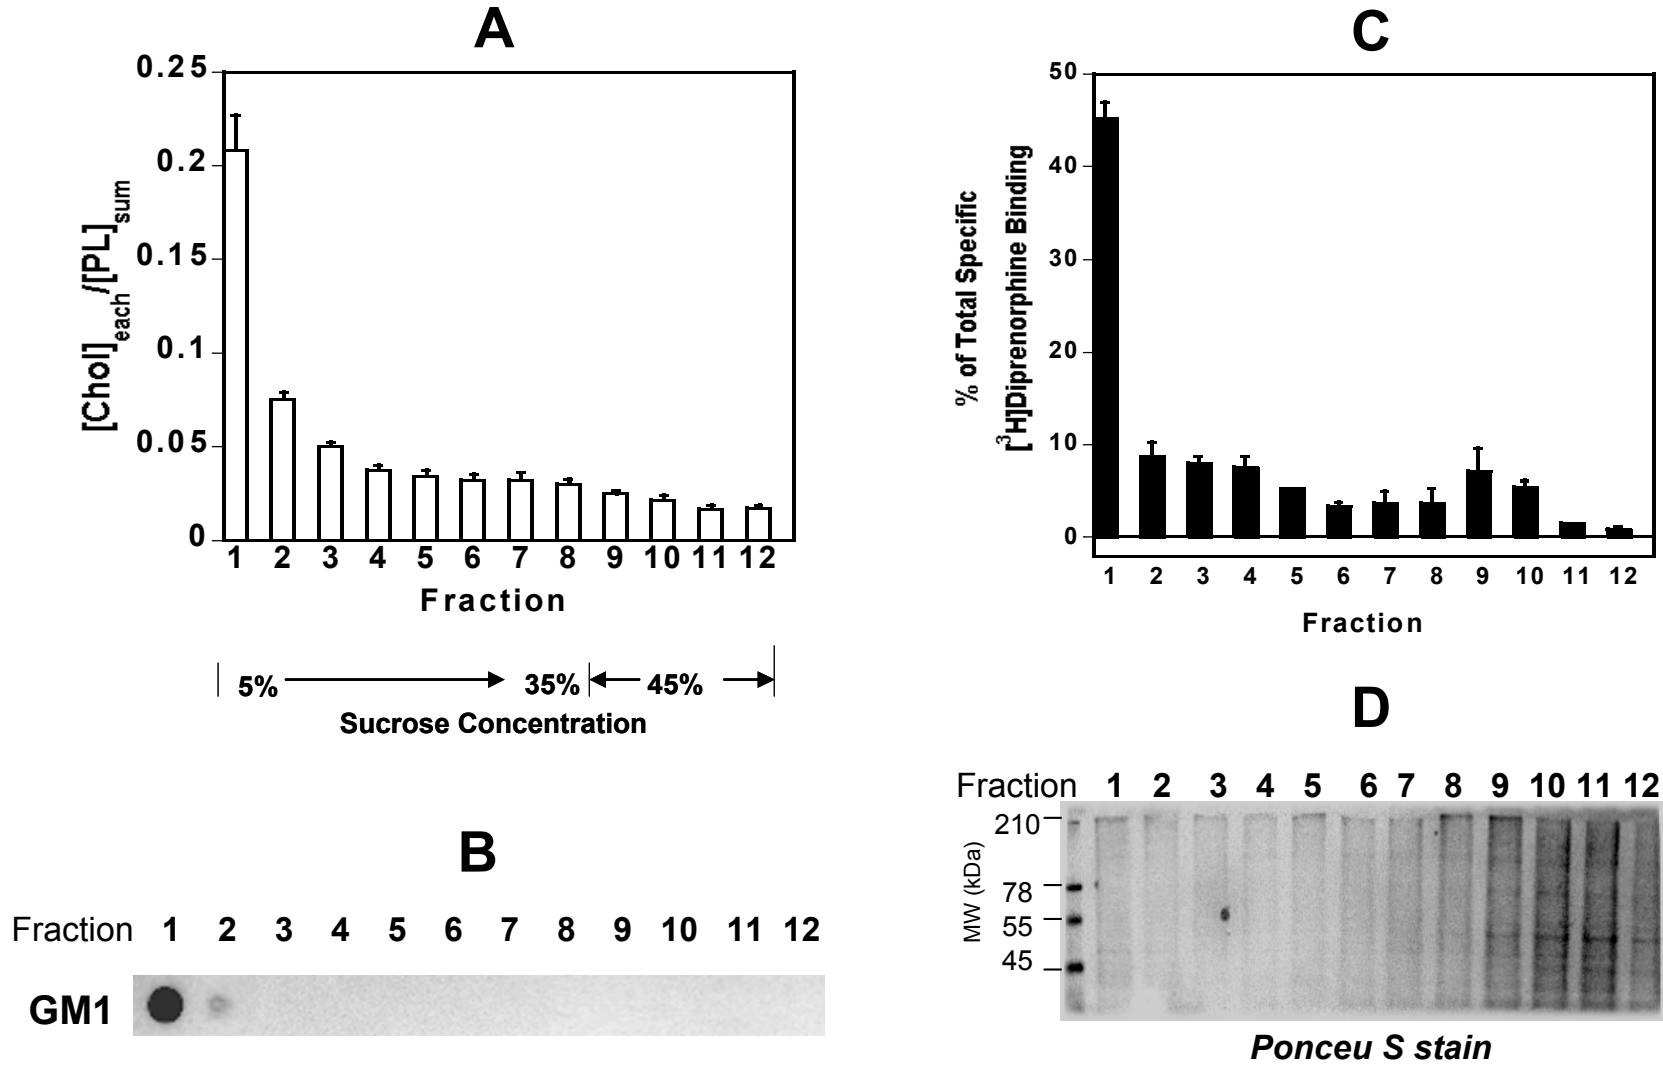

Fig.S3A

### NG108-15 cells

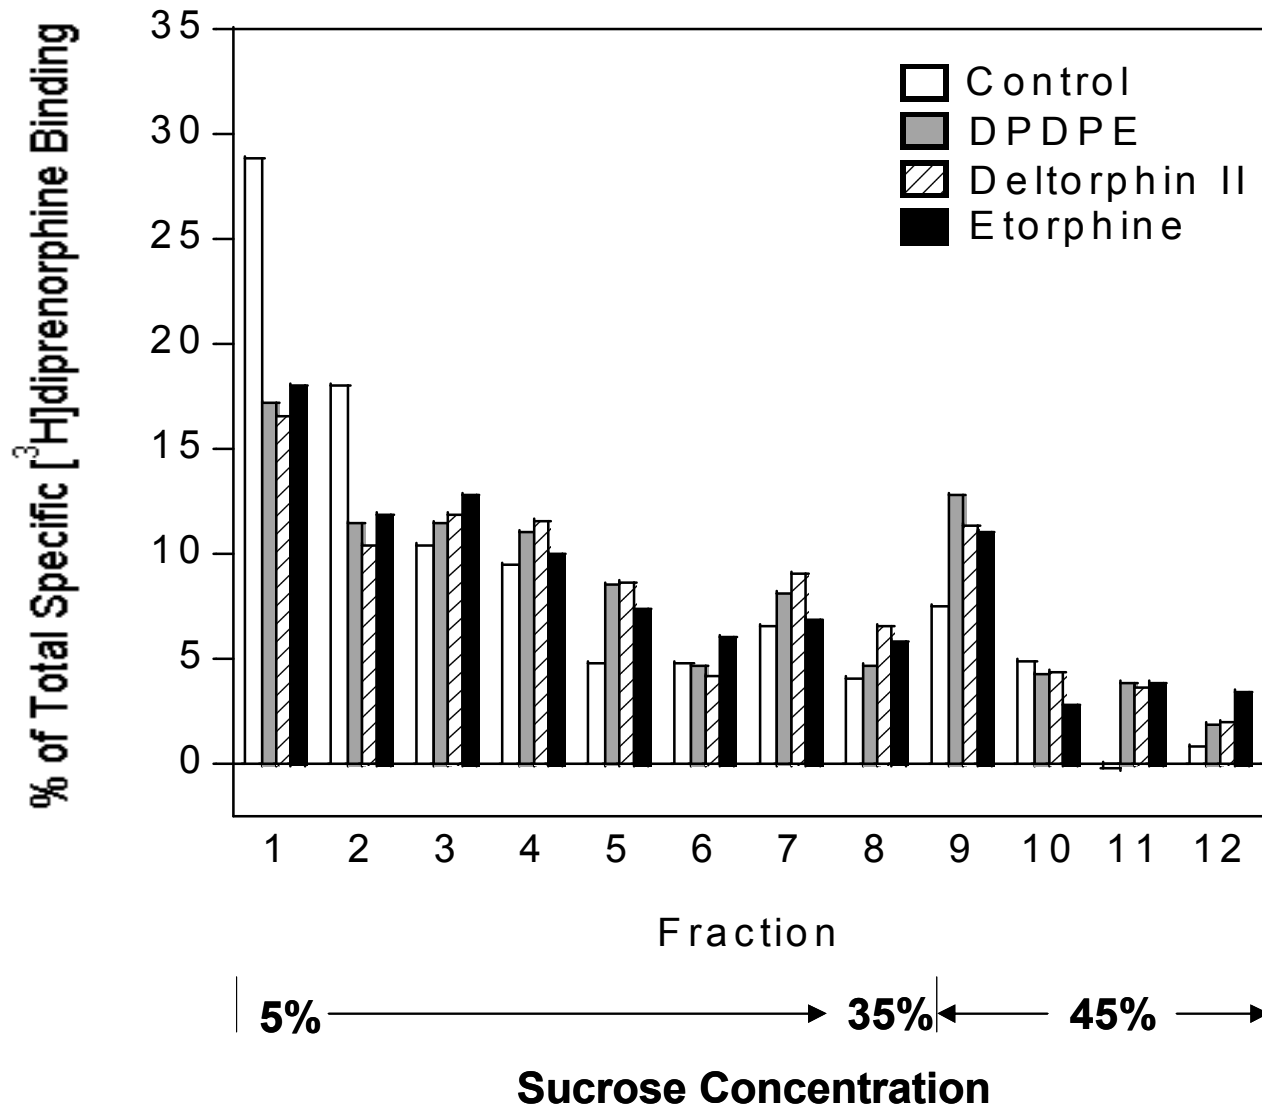

Fig.S3B

### NG108-15 cells

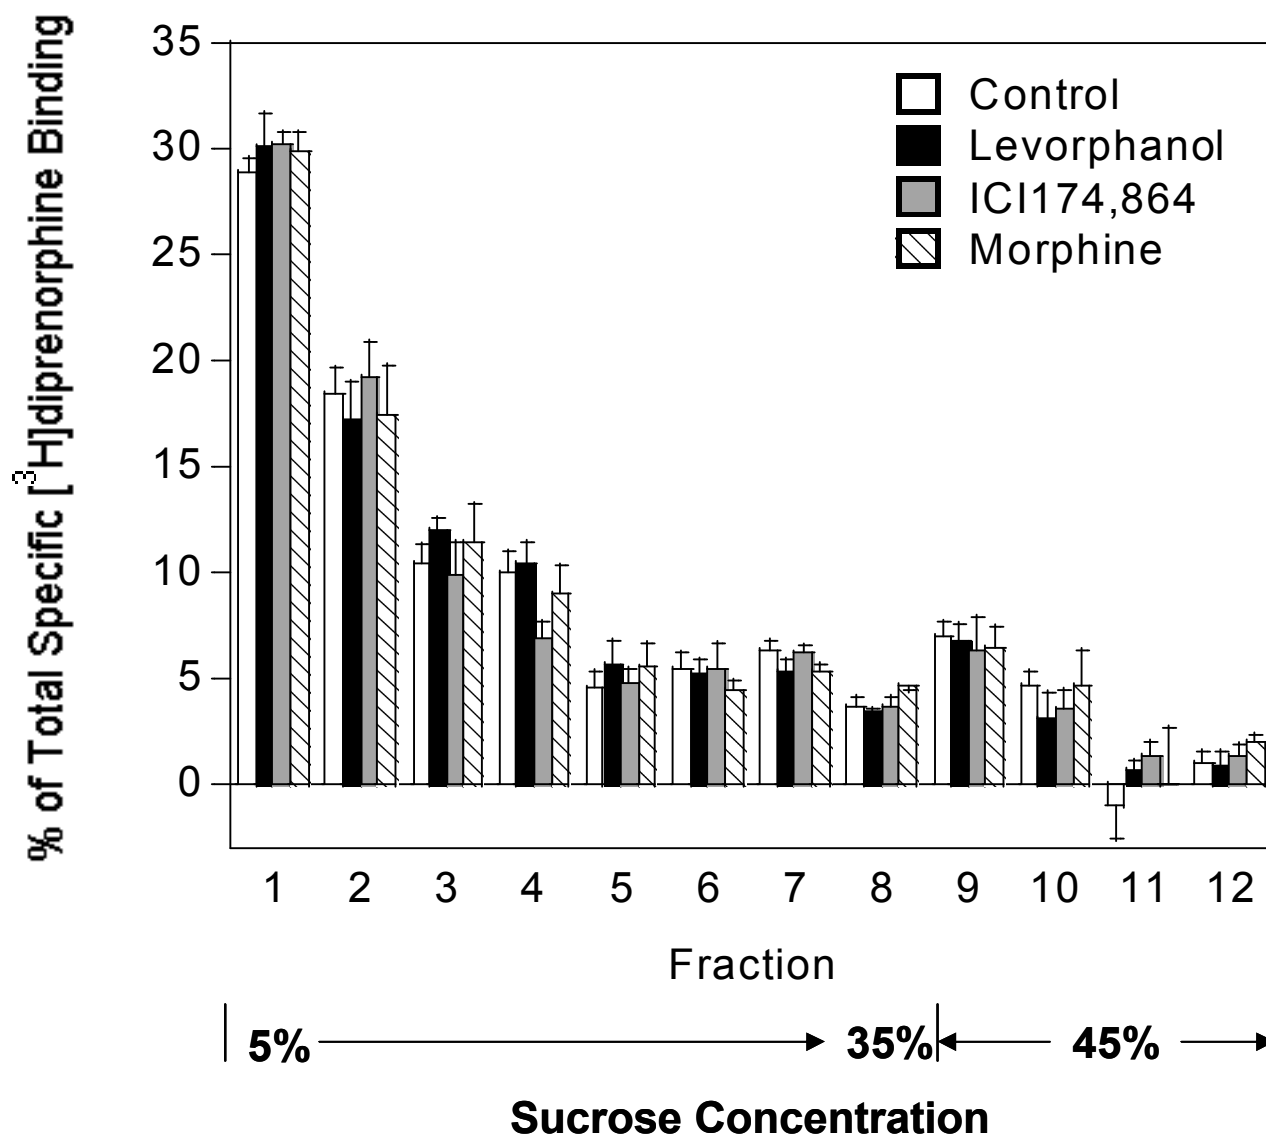

Fig. S4

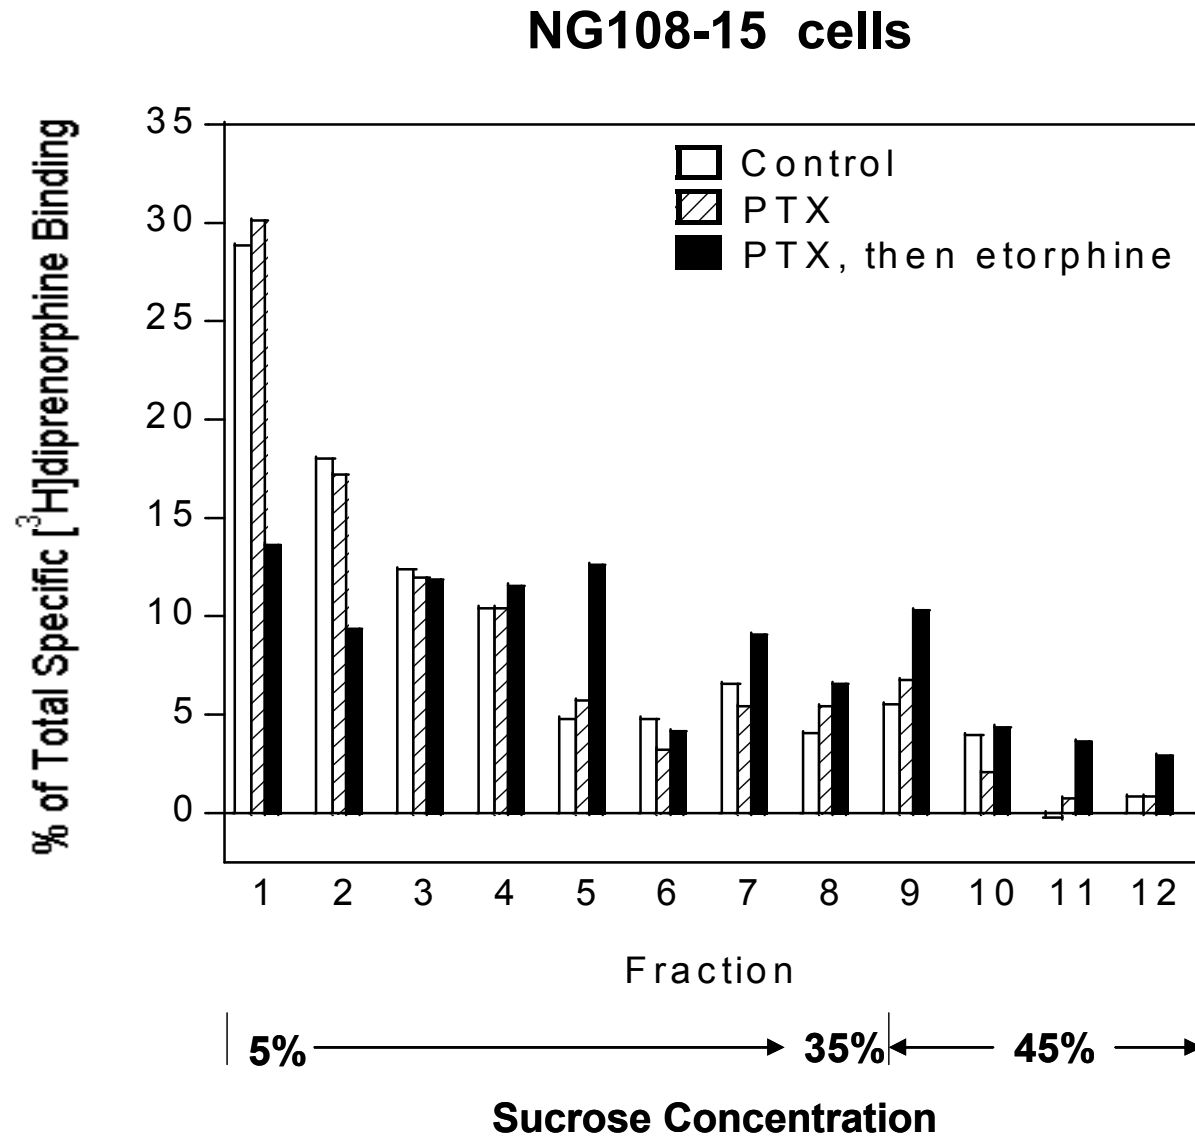

Supplement: NIHMS17942-supplement.pdf [file NIHMS17942-supplement.pdf]
